# Supplementary material for: A real-world study of hereditary angioedema patients due to C1 inhibitor deficiency treated with danazol in the Brazilian Public Health System
Source: Front Med (Lausanne). 2024 Sep 6;11:1343547. doi: 10.3389/fmed.2024.1343547 (PMC11414478; doi:10.3389/fmed.2024.1343547)
Supplement: Supplementary file 1 [file Data_Sheet_1.docx]

Supplementary Material

**A Real-World Study of Hereditary Angioedema Patients due to C1 inhibitor deficiency Treated with Danazol in the Brazilian Public Health System**

Alessandra Mileni Versuti Ritter2, Suelen Silva2, Robson de Paula1, Juliana Senra1, Fabio Carvalho1, Tatiane Ribeiro1, Solange Oliveira Rodrigues Valle3

1Takeda Distribuidora Ltd., São Paulo Brazil

2IQVIA, São Paulo, Brazil

3Hospital Universitário Clementino Fraga Filho da Universidade Federal do Rio de Janeiro, Rio de Janeiro, RJ, Brazil

*** Correspondence:**Solange Oliveira Rodrigues Valle
solangervalle@gmail.com

**Supplementary Tables**

**Table I.** List of ICD-10 potentially resulting in misclassification.

| **ICD-10 CODE** | **Description** |
| --- | --- |
|  |  |
| **Q82.0** | Hereditary lymphoedema |
| **I89.0** | Lymphoedema, not elsewhere classified |
| **G51.2** | Melkersson syndrome |
| **D68.1** | Hereditary factor XI deficiency |
| **Q18.6** | Macrocheilia |
| **D69.3** | Idiopathic thrombocytopenic purpura |
| **L930** | Discoid lupus erythematosus |
| **L931** | Subacute cutaneous lupus erythematosus |
| **M321** | Systemic lupus erythematosus with organ or system involvement |
| **M328** | Other forms of systemic lupus erythematosus |
| **N800** | Endometriosis of uterus |
| **N801** | Endometriosis of ovary |
| **N802** | Endometriosis of fallopian tube |
| **N803** | Endometriosis of pelvic peritoneum |
| **N804** | Endometriosis of rectovaginal septum and vagina |
| **N805** | Endometriosis of intestine |
| **N808** | Other endometriosis |
| **L50.0** | Allergic urticaria |
| **L50.1** | Idiopathic urticaria |
| **L50.2** | Urticaria due to cold and heat |
| **L50.3** | Dermatographic urticaria |
| **L50.4** | Vibratory urticaria |
| **L50.5** | Cholinergic urticaria |
| **L50.6** | Contact urticaria |
| **L50.8** | Other urticaria |
| **L50.9** | Urticaria, unspecified |
| **D47** | Other neoplasms of uncertain or unknown behavior of lymphoid, hematopoietic and related tissue |
| **D47.2** | Monoclonal gammopathy of undetermined significance (MGUS) |
| **C81** | Hodgkin lymphoma |
| **C81.0** | Nodular lymphocyte predominant Hodgkin lymphoma |
| **C81.1** | Nodular sclerosis (classical) Hodgkin lymphoma |
| **C81.2** | Mixed cellularity (classical) Hodgkin lymphoma |
| **C81.3** | Lymphocyte depleted (classical) Hodgkin lymphoma |
| **C81.4** | Lymphocyte-rich (classical) Hodgkin lymphoma |
| **C81.7** | Other (classical) Hodgkin lymphoma |
| **C81.9** | Hodgkin lymphoma, unspecified |
| **C82** | Follicular lymphoma |
| **C82.0** | Follicular lymphoma grade I |
| **C82.1** | Follicular lymphoma grade II |
| **C82.2** | Follicular lymphoma grade III, unspecified |
| **C82.3** | Follicular lymphoma grade IIIa |
| **C82.4** | Follicular lymphoma grade IIIb |
| **C82.5** | Diffuse follicle centre lymphoma |
| **C82.6** | Cutaneous follicle centre lymphoma |
| **C82.7** | Other types of follicular lymphoma |
| **C82.9** | Follicular lymphoma, unspecified |
| **C83** | Non-follicular lymphoma |
| **C83.0** | Small cell B-cell lymphoma |
| **C83.1** | Mantle cell lymphoma |
| **C83.3** | Diffuse large B-cell lymphoma |
| **C83.5** | Lymphoblastic diffuse lymphoma |
| **C83.7** | Burkitt lymphoma |
| **C83.8** | Other non-follicular lymphoma |
| **C83.9** | Non-follicular (diffuse) lymphoma, unspecified |
| **C84** | Mature T/NK-cell lymphomas |
| **C84.4** | Peripheral T-cell lymphoma, not elsewhere classified |
| **C84.5** | Other mature T/NK-cell lymphomas |
| **C84.8** | Cutaneous T-cell lymphoma, unspecified |
| **C84.9** | Mature T/NK-cell lymphoma, unspecified |
| **C85** | Other and unspecified types of non-Hodgkin lymphoma |
| **C85.1** | B-cell lymphoma, unspecified |
| **C85.2** | Mediastinal (thymic) large B-cell lymphoma |
| **C85.7** | Other specified types of non-Hodgkin lymphoma |
| **C85.9** | Non-Hodgkin lymphoma, unspecified |
| **C86** | Other specified types of T/NK-cell lymphoma |
| **C86.1** | Hepatosplenic T-cell lymphoma |
| **C86.2** | Enteropathy-type (intestinal) T-cell lymphoma |
| **C86.3** | Subcutaneous panniculitis-like T-cell lymphoma |
| **C86.6** | Primary cutaneous CD30-positive T-cell proliferations |
| **C88** | Malignant immunoproliferative diseases |
| **C88.0** | Waldenström macroglobulinemia |
| **C88.4** | Extranodal marginal zone B-cell lymphoma of mucosa-associated lymphoid tissue [MALT-lymphoma] |
| **C88.7** | Other malignant immunoproliferative diseases |
| **C88.9** | Malignant immunoproliferative disease, unspecified |
| **C90** | Multiple myeloma and malignant plasma cell neoplasms |
| **C90.0** | Multiple myeloma |
| **C91** | Lymphoid leukaemia |
| **C91.0** | Acute lymphoblastic leukaemia |
| **C91.1** | Chronic lymphocytic leukaemia of B-cell type |
| **C91.8** | Mature B-cell leukaemia Burkitt-type |
| **C91.4** | Hairy-cell leukaemia |
| **D72.1** | Eosinophilia |
| **D76.1** | Hemophagocytic lymphohistiocytosis |
| **D82.0** | Wiskott-Aldrich syndrome |
| **D82.3** | Immunodeficiency following hereditary defective response to Epstein-Barr virus |
| **J84.2** | Lymphoid interstitial pneumonia |
| **L41.0** | Pityriasis lichenoides et varioliformis acuta |
| **L41.1** | Pityriasis lichenoides chronica |

**Table II.** International Classification of Diseases (ICD-10) code list for identifying HAE attacks cases in DATASUS.

| **ICD-10 CODE** | **Description** |
| --- | --- |
| **K35.8** | Acute appendicitis, other and unspecified |
| **K36** | Other appendicitis |
| **K37** | Unspecified appendicitis |
| **K58** | Irritable bowel syndrome |
| **R10.0** | Acute abdomen (abdominal and pelvic pain) |
| **R09.0** | Asphyxia |
| **J38.4** | Oedema of larynx |
| **K85** | Acute pancreatitis |
| **T78.2** | Anaphylactic shock, unspecified |
| **T78.3** | Angioneurotic edema |
| **R49.0** | Dysphonia |
| **R60** | Oedema, not elsewhere classified |
| **T78.4** | Allergy, unspecified |
| **R52.1** | Chronic intractable pain |
| **R52.2** | Other chronic pain |
| **R52.9** | Pain, unspecified |
| **R10** | Abdominal pain |
| **L53.2** | Erythema marginatum |
| **R60.1** | Stridor |
| **R06.8** | Breathlessness |
| **R60** | Oedema |
| **R52.0** | Acute pain |
| **R10.4** | Other and unspecified abdominal pain |
| **R60.9** | Oedema, unspecified |
| **J039** | Acute tonsillitis, unspecified |
| **L98** | Other infections of skin classified in other parties |
| **R22** | Localized swelling, mass and lump of skin and subcutaneous tissue |
| **R19.0** | Intra-abdominal and pelvic swelling, mass and lump |
| **T88.4** | Failed or difficult intubation |
| **J96.0** | Acute respiratory failure |
| **J96.9** | Acute respiratory failure not specific |
| **J98.8** | Other specific respiratory disorders |
| **J98.9** | Non-specific respiratory disorders |

**Table III.** List of SUS standard procedures potentially related to HAE attacks selected for the study.

| **SIGTAP Code** | **Procedure** |
| --- | --- |
| **0209010045** | Laparoscopy |
| **0306020106** | Plasma transfusion |
| **0301100071** | Tracheostomy care |
| **0404010377** | Tracheostomy |
| **0412010127** | Tracheostomy with placement of a tracheal orthosis |
| **0412020076** | Mediastinal tracheostomy |
| **0702050024** | Cannula for tracheostomy |
| **0303060050** | Anaphylactic shock treatment |
| **0209010061** | Videolaparoscopy |
| **0303070099** | Treatment of enteritis and non-infectious colitis |
| **0303070102** | Treatment of other diseases of digestive tract |
| **0303070110** | Treatment of other bowel diseases |
| **0303140127** | Treatment of other upper respiratory diseases |
| **0303140135** | Treatment of other respiratory tract diseases |
| **0302040013** | Physiotherapeutic care in patients with systemic respiratory disorder |
| **0302040021** | Physiotherapeutic care in patients with non-systemic respiratory disorder |

**Table IV.** List of SUS standard procedures potentially related to HAE severe attacks.

| **ICD-10 CODE** | **Description** |
| --- | --- |
| **R09.0** | Asphyxia |
| **J38.4** | Oedema of larynx |
| **K85** | Acute pancreatitis |
| **T78.2** | Anaphylactic shock, unspecified |
| **R60.1** | Stridor |
| **R06.8** | Breathlessness |
| **Procedure code** | **Description** |
| **0209010045** | Laparoscopy |
| **0301100071** | Tracheostomy care |
| **0404010377** | Tracheostomy |
| **0412010127** | Tracheostomy with placement of a tracheal orthosis |
| **0412020076** | Mediastinal tracheostomy |
| **0702050024** | Cannula for tracheostomy |
| **0303060050** | Anaphylactic shock treatment |
| **0209010061** | Videolaparoscopy |
| **0302040013** | Physiotherapeutic care in patients with systemic respiratory disorder |
| **0302040021** | Physiotherapeutic care in patients with non-systemic respiratory disorder |

**Table V.** Proportion of patients with severe attacks (report of ICD-10 and/or procedures claim defined as proxy of severe attack*) by calendar year (n=799).

|  | **2011** | **2012** | **2013** | **2014** | **2015** | **2016** | | **2017** | **2018** | **2019** | **2020** | **2021** |
| --- | --- | --- | --- | --- | --- | --- | --- | --- | --- | --- | --- | --- |
| **Total population with attendance by year** | n= 379 | n= 440 | n= 483 | n=512 | n=506 | n=407 | | n=361 | n=413 | n=381 | n=290 | n=322 |
| **Patients with severe attack in the respective year, among the total population attended per year – n (%)** | 4 (1.1) | 5 (1.1%) | 2 (0.4%) | 3 (0.6%) | 4 (0.8%) | 2 (0.5%) | 3 (0.8%) | | 3 (0.7%) | 4 (1.1%) | 2 (0.7%) | 3 (0.9%) |
| **Severe attack population with attendance by year** | **14** | **18** | **19** | **21** | **22** | **18** | **18** | | **18** | **21** | **16** | **15** |
| **Patients with severe attack in the respective year - n (%)** | 4 (28.6%) | 5 (27.8%) | 2 (10.5%) | 3 (14.3%) | 4 (18.2%) | 2 (11.2%) | 3 (16.7%) | | 3 (16.7%) | 4 (19.0%) | 2 (12.5%) | 3 (20.0%) |
| Patients with 1 attack | 3 (21.4%) | 4 (22.2%) | 2 (10.5%) | 2 (9.5%) | 2 (9.1%) | 1 (5.6%) | 2 (11.1%) | | 2 (11.1%) | 3 (14.3%) | 2 (12.5%) | 2 (13.3%) |
| Patients with 2 attacks | 0 (0.0%) | 1 (5.6%) | 0 (0.0%) | 0 (0.0%) | 1 (4.6%) | 0 (0.0%) | 1 (5.6%) | | 0 (0.0%) | 1 (4.8%) | 0 (0.0%) | 0 (0.0%) |
| Patients with 3 attacks | 1 (7.1%) | 0 (0.0%) | 0 (0.0%) | 1 (4.8%) | 0 (0.0%) | 0 (0.0%) | 0 (0.0%) | | 0 (0.0%) | 0 (0.0%) | 0 (0.0%) | 0 (0.0%) |
| Patients with 4 attacks | 0 (0.0%) | 0 (0.0%) | 0 (0.0%) | 0 (0.0%) | 0 (0.0%) | 0 (0.0%) | 0 (0.0%) | | 0 (0.0%) | 0 (0.0%) | 0 (0.0%) | 0 (0.0%) |
| Patients with 5 attacks | 0 (0.0%) | 0 (0.0%) | 0 (0.0%) | 0 (0.0%) | 0 (0.0%) | 0 (0.0%) | 0 (0.0%) | | 0 (0.0%) | 0 (0.0%) | 0 (0.0%) | 0 (0.0%) |
| Patients with 6 attacks | 0 (0.0%) | 0 (0.0%) | 0 (0.0%) | 0 (0.0%) | 0 (0.0%) | 0 (0.0%) | 0 (0.0%) | | 0 (0.0%) | 0 (0.0%) | 0 (0.0%) | 1 (6.7%) |
| Patients with 7 attacks | 0 (0.0%) | 0 (0.0%) | 0 (0.0%) | 0 (0.0%) | 0 (0.0%) | 0 (0.0%) | 0 (0.0%) | | 0 (0.0%) | 0 (0.0%) | 0 (0.0%) | 0 (0.0%) |
| Patients with 8 or more attacks | 0 (0.0%) | 0 (0.0%) | 0 (0.0%) | 0 (0.0%) | 1 (4.6%) | 1 (5.6%) | 0 (0.0%) | | 1 (5.6%) | 0 (0.0%) | 0 (0.0%) | 0 (0.0%) |
| **General hospitalization – n of patients (%)** | 3 (21.4%) | 5 (27.8%) | 4 (21.1%) | 7 (33.3%) | 11 (50.0%) | 8 (44.4%) | 8 (44.4%) | | 7 (38.9%) | 10 (47.6%) | 10 (62.5%) | 5 (33.3%) |
| **General ICU hospitalization – n of patients (%)** | 1 (7.1%) | 2 (11.1%) | 3 (15.8%) | 4 (19.1%) | 4 (18.2%) | 4 (22.2%) | 3 (16.7%) | | 1 (5.6%) | 4 (19.1%) | 4 (25.0%) | 2 (13.3%) |
| **ICD-10 HAE-related ICU – n of patients (%)** | 0 (0.0%) | 0 (0.0%) | 0 (0.0%) | 0 (0.0%) | 0 (0.0%) | 0 (0.0%) | 1 (5.6%) | | 0 (0.0%) | 0 (0.0%) | 1 (6.3%) | 0 (0.0%) |
| Anaphylactic shock treatment | 1 (25.0%) | 2 (40.0%) | 1 (50.0%) | 1 (33.33%) | 0 (0.0%) | 0 (0.0%) | 2 (66.7%) | | 1 (33.3%) | 3 (75.0%) | 1 (50.0%) | 1 (33.3%) |
| Tracheostomy | 2 (50.0%) | 2 (40.0%) | 1 (50.0%) | 1 (33.3%) | 0 (0.0%) | 0 (0.0%) | 0 (0.0%) | | 0 (0.0%) | 0 (0.0%) | 1 (50.0%) | 0 (0.0%) |
| Physiotherapeutic care in patients with non-systemic respiratory disorder | 1 (25.0%) | 1 (20.0%) | 0 (0.0%) | 1 (33.3%) | 2 (50.0%) | 1 (50.0%) | 1 (33.3%) | | 0 (0.0%) | 0 (0.0%) | 0 (0.0%) | 2 (66.7%) |
| Physiotherapeutic care in patients with systemic respiratory disorder | 0 (0.0%) | 0 (0.0%) | 0 (0.0%) | 0 (0.0%) | 0 (0.0%) | 0 (0.0%) | 0 (0.0%) | | 1 (33.3%) | 0 (0.0%) | 0 (0.0%) | 0 (0.0%) |
| **ICD-10 HAE-related hospitalization – n of patients (%)** | 1 (7.1%) | 0 (0.0%) | 0 (0.0%) | 0 (0.0%) | 2 (9.1%) | 1 (5.6%) | 2 (11.1%) | | 1 (5.6%) | 1 (4.8%) | 1 (6.3%) | 0 (0.0%) |
| Anaphylactic shock, unspecified | 0 (0.0%) | 1 (20.0%) | 1 (50.0%) | 0 (0.0%) | 0 (0.0%) | 0 (0.0%) | 2 (66.7%) | | 1 (50.0%) | 1 (33.3%) | 1 (50.0%) | 0 (0.0%) |
| Breathlessness | 0 (0.0%) | 0 (0.0%) | 0 (0.0%) | 0 (0.0%) | 0 (0.0%) | 0 (0.0%) | 0 (0.0%) | | 0 (0.0%) | 0 (0.0%) | 0 (0.0%) | 0 (0.0%) |
| Oedema of larynx | 1 (25.0%) | 0 (0.0%) | 0 (0.0%) | 0 (0.0%) | 0 (0.0%) | 0 (0.0%) | 0 (0.0%) | | 0 (0.0%) | 0 (0.0%) | 0 (0.0%) | 0 (0.0%) |
